# Supplementary material
Source: PubMed Central journal article supplement (PMC2829113)

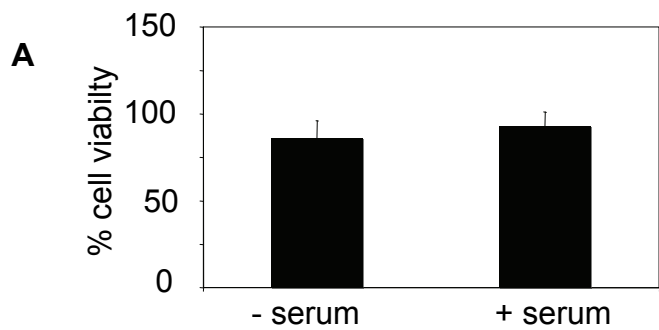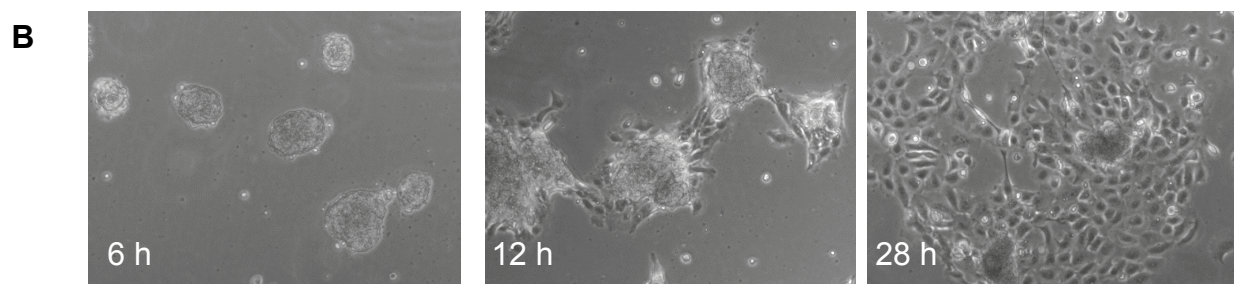

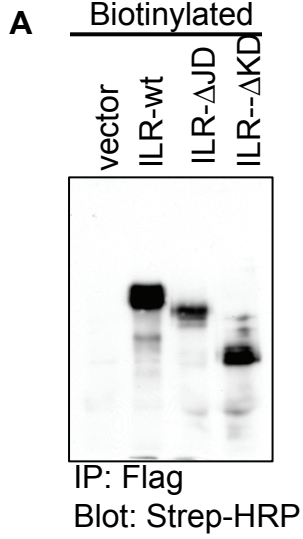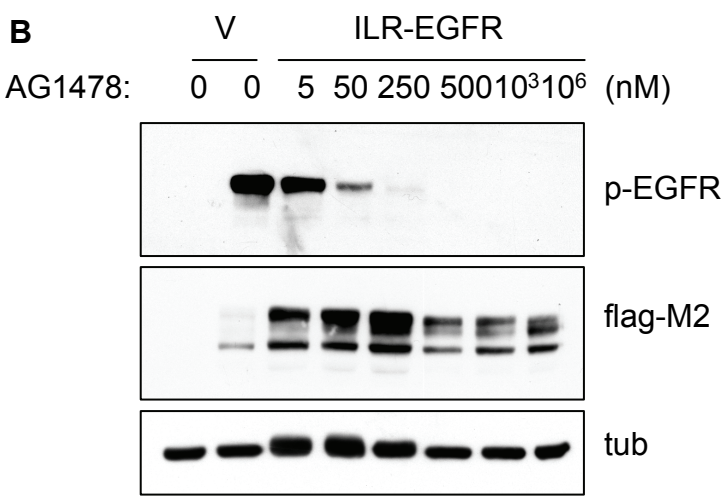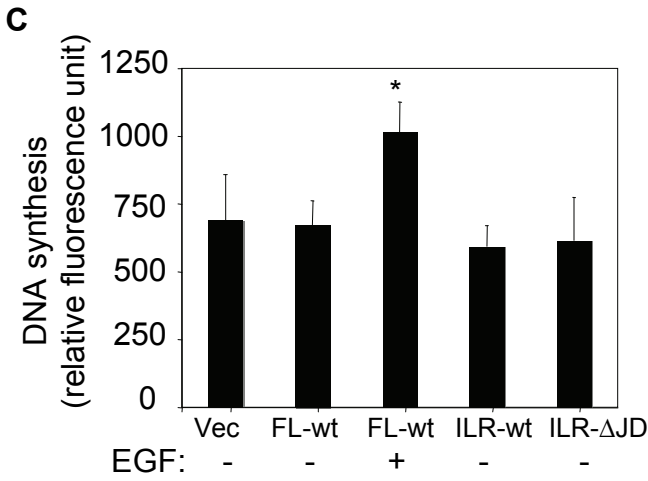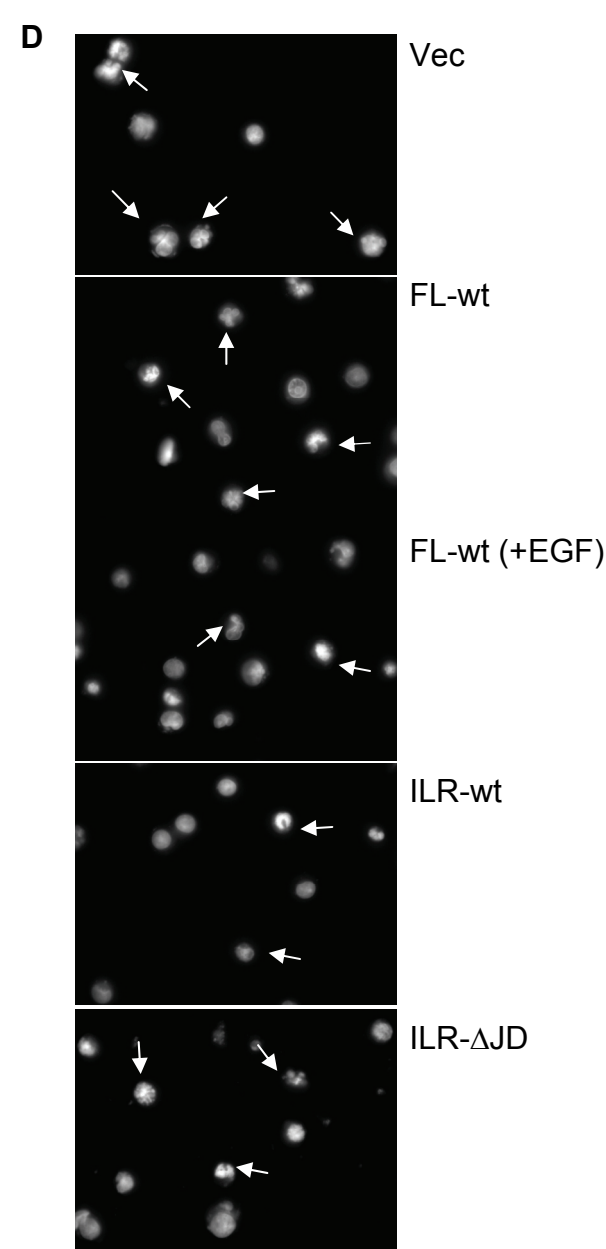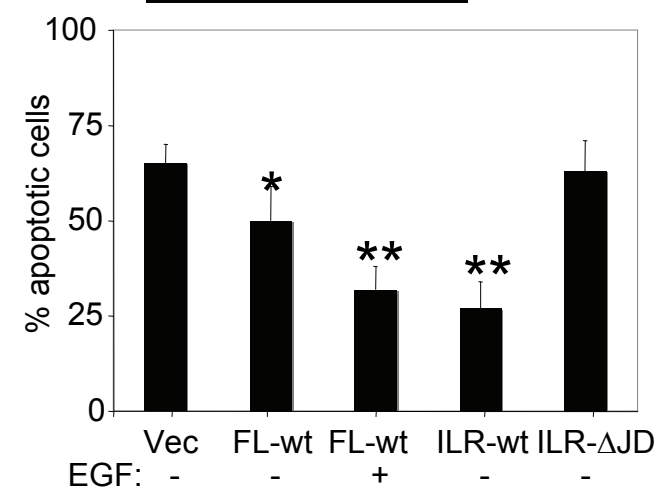

Supplemental Figure 2

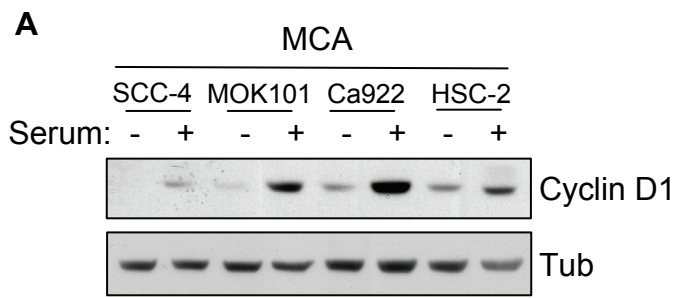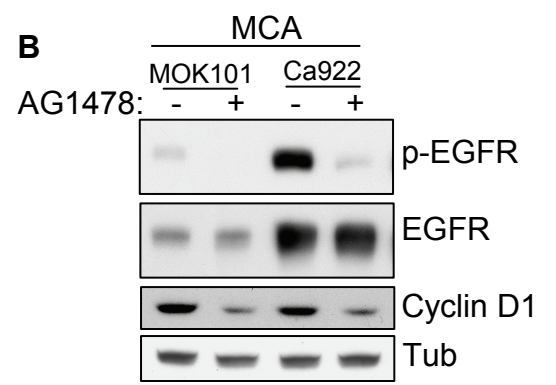

Supplemental Figure 3

**A**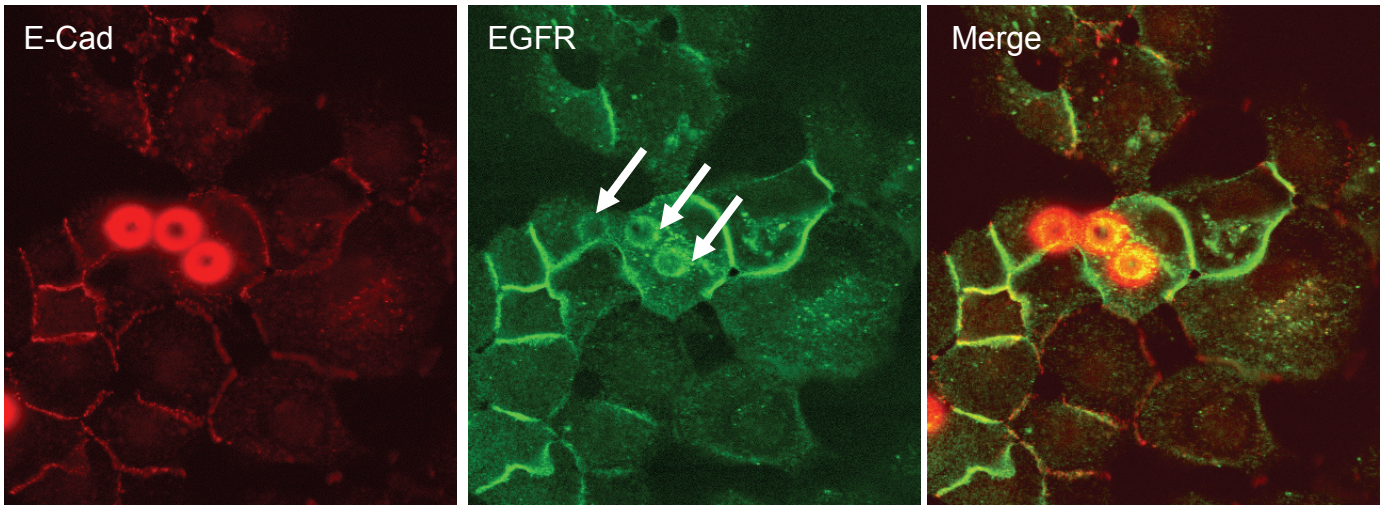**B**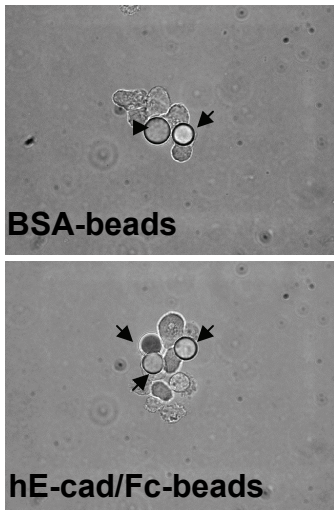**C**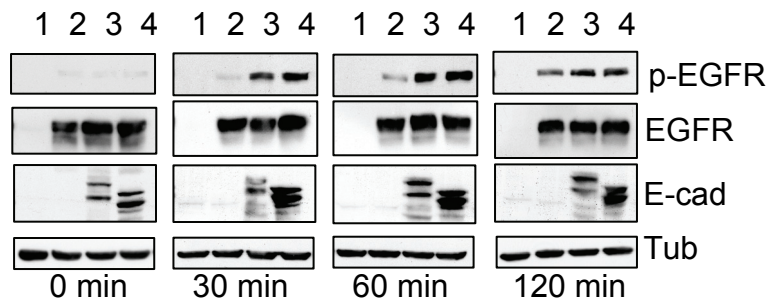

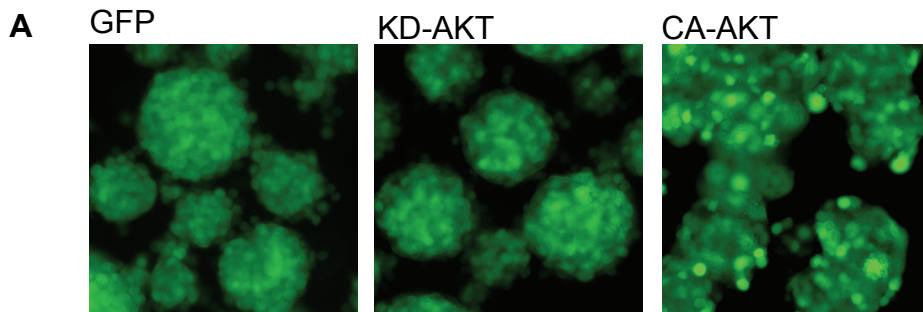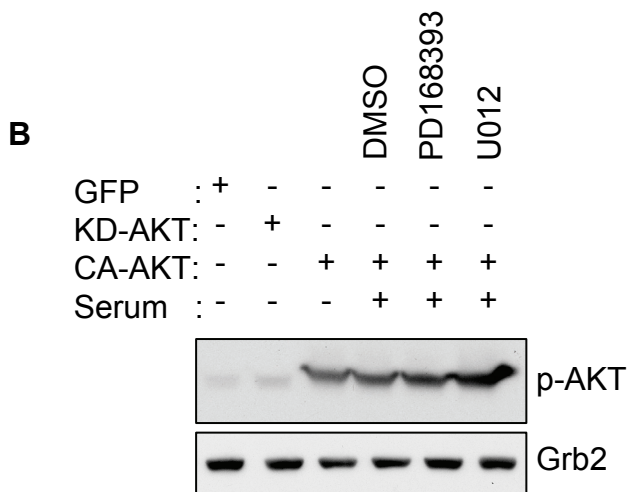

Supplement: NIHMS152413-supplement-2.pdf [file NIHMS152413-supplement-2.pdf]
